# Supplementary material for: Natural Disasters and Preferences for Redistribution: The Impact of Collective and Abrupt Disruptions
Source: Oxford University Press journal article supplement (doi:10.1093/esr/jcab059), 2021-12-01
Supplement: jcab059_supplementary_material.pdf [file jcab059_supplementary_material.pdf]

# Natural disasters: the impact of collective and sudden events on preferences for redistribution

## Online Appendix

### Contents

|   |                                                                          |    |
|---|--------------------------------------------------------------------------|----|
| A | Summary statistics                                                       | 2  |
| B | Main results in Table 2 excluding one country at a time                  | 3  |
| C | Characteristics of populations in high and low earthquake risk areas     | 4  |
| D | Individual level results, only democracies                               | 6  |
| E | Matching WVS data to earthquake data                                     | 7  |
| F | Data on other disaster types                                             | 8  |
| G | Correlations between risk of different disaster types                    | 9  |
| H | Heterogeneous impact by income decile                                    | 10 |
| I | Other alternative explanations: risk attitudes and respect for tradition | 11 |

## A Summary statistics

Table A1. Summary statistics

| Variable        | Obs     | Mean      | Std. Dev. | Min       | Max      |
|-----------------|---------|-----------|-----------|-----------|----------|
| Redistribution  | 240,152 | 5.191724  | 2.99449   | 1         | 10       |
| Dist(eq_34)     | 251,240 | 0.4833769 | 0.6332229 | 0         | 3.319654 |
| Age             | 257,007 | 40.99629  | 16.27236  | 13        | 99       |
| Age sq          | 257,007 | 1945.484  | 1500.025  | 169       | 9801     |
| Male            | 255,416 | 0.4681774 | 0.4989873 | 0         | 1        |
| Married         | 257,426 | 0.5675301 | 0.4954197 | 0         | 1        |
| Unemployed      | 257,426 | 0.0909543 | 0.2875447 | 0         | 1        |
| Abs latitude    | 251,240 | 32.97146  | 14.58118  | 0.1194381 | 67.66924 |
| Dist(coast)     | 251,240 | 0.2546978 | 0.2818552 | 0         | 1.989509 |
| quake           | 251,240 | 0.067334  | 0.2506001 | 0         | 1        |
| quake_1         | 251,240 | 0.0767155 | 0.26614   | 0         | 1        |
| Hard work       | 196,090 | 6.782457  | 2.833635  | 1         | 10       |
| Risk loving     | 70,525  | 5.081149  | 2.944442  | 1         | 10       |
| Open new ideas  | 89,688  | 5.24845   | 2.933398  | 1         | 10       |
| Welcome changes | 15,675  | 6.211738  | 2.95973   | 1         | 10       |
| Trust gov       | 227,170 | 2.403108  | 0.9328672 | 1         | 4        |
| Educ            | 226,905 | 4.708658  | 2.237758  | 1         | 8        |
| Lights2000      | 249,774 | 9.57018   | 12.87824  | 0.00821   | 62.9814  |
| Area(1000km2)   | 251,240 | 0.1359466 | 0.3037529 | 3.55E-11  | 2.997855 |
| Year            | 251,240 | 2002.846  | 7.233917  | 1981      | 2014     |

## B Main results in Table 2 excluding one country at a time

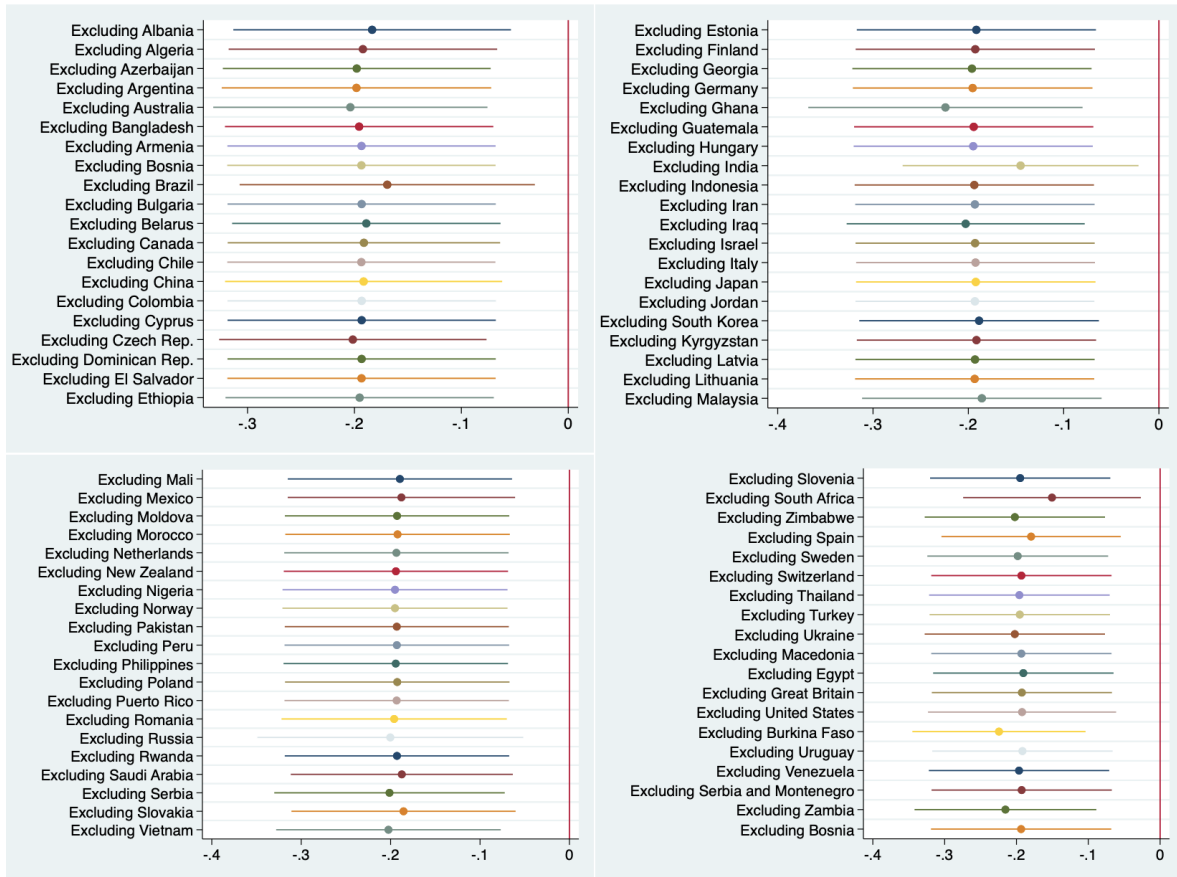

## C Characteristics of populations in high and low earthquake risk areas

Figure 1: Balance test, entire sample

| VARIABLES              | (1)<br>Distance to earthq zones 3-4 |
|------------------------|-------------------------------------|
| Age                    | 0.000<br>(0.000)                    |
| Agesq                  | -0.000<br>(0.000)                   |
| Male                   | -0.007***<br>(0.002)                |
| Married                | -0.006**<br>(0.003)                 |
| unemployed             | 0.007<br>(0.006)                    |
| Income level (deciles) | 0.000<br>(0.001)                    |
| Education              | -0.000<br>(0.001)                   |
| Absolute latitude      | -0.008*<br>(0.005)                  |
| Dist(coast), 1000km    | -0.219*<br>(0.118)                  |
| Night lights per km2   | -0.808<br>(1.145)                   |
| Observations           | 200,968                             |
| R-squared              | 0.860                               |
| Regions                | 762                                 |
| Countries              | 77                                  |

Figure 2: Balance test including GINI coefficient at the subnational level, OECD sub-sample

| VARIABLES                                | (1)<br>Distance to earthq zones 3-4 |
|------------------------------------------|-------------------------------------|
| Age                                      | 0.000<br>(0.000)                    |
| Agesq                                    | 0.000<br>(0.000)                    |
| Male                                     | -0.002<br>(0.002)                   |
| Married                                  | 0.001<br>(0.003)                    |
| Unemployed                               | 0.002<br>(0.003)                    |
| Income level (deciles)                   | -0.000<br>(0.001)                   |
| Education                                | 0.001<br>(0.001)                    |
| Gini coefficient (subnational, aftertax) | -0.910<br>(0.824)                   |
| Absolute latitude                        | 0.011<br>(0.008)                    |
| Dist(coast), 1000km                      | -0.007<br>(0.161)                   |
| Night lights per km2                     | 429.086<br>(401.756)                |
| Observations                             | 54,882                              |
| R-squared                                | 0.922                               |
| Regions                                  | 184                                 |
| Countries                                | 24                                  |

## D Individual level results, only democracies

| VARIABLES                        | (1)<br>Income equality | (2)<br>Income equality | (3)<br>Income equality |
|----------------------------------|------------------------|------------------------|------------------------|
| Distance to earthquake zones 3-4 | -0.295***<br>(0.085)   | -0.294***<br>(0.087)   | -0.699***<br>(0.178)   |
| Dist(earthq) squared             |                        |                        | 0.173***<br>(0.057)    |
| Observations                     | 131,473                | 120,733                | 131,473                |
| R-squared                        | 0.126                  | 0.136                  | 0.126                  |
| Baseline controls                | Y                      | Y                      |                        |
| Outcome measure                  | incomesequal           | incomesequal           |                        |
| Regions                          | 457                    | 446                    | 457                    |
| Countries                        | 51                     | 51                     | 51                     |
| Impact at 500 km                 |                        |                        | -0.613                 |

Standard errors in parentheses, clustered at the first administrative division level. All specifications include country-by-year fixed effects and control for individual characteristics. Model (1) shows baseline results. Model (2) controls for level of education and district level development. Model (3) adds squared distance to high intensity earthquake zones (to allow for a non-linear effect of distance). \*\*\*p<0.01, \*\*p<0.05, \*p<0.1

## E Matching WVS data to earthquake data

In her compilation, Bentzen (2019) linked earthquake zones to a shapefile containing all subnational districts across the world and used GIS software to create a variable measuring distance from a subnational district's border to the closest high intensity earthquake zone. She classified high intensity as intensity zones 3 and 4. I used her publicly available replication files to obtain this measure of distance to high intensity earthquake zone for each sub-national district in the WVS dataset.

The process of linking this variable at the sub-national level to the pooled World Values Survey (WVS 1981-2014) was at times manual, since the names and categories referring to sub-national district in her dataset were not exactly the same to that in the World Values Survey data. The reason for this was that the variable X048 (capturing location of interview) in the World Values Survey is sometimes not consistent across waves within the same country. Bentzen (2019)'s linked dataset was thus the result of a process of going through the sub-national district names and homogenizing the sub-national district categories of the same country across the waves. Then, she edited a shapefile<sup>1</sup> of all first administrative divisions worldwide (available here: <https://gadm.org/>) to resemble the chosen divisions as close as possible. The sub-national divisions in WVS and those in the publicly available shapefile did not match perfectly either because for some countries, the WVS variable captures the first administrative divisions in the country (first level of disaggregation) but in other cases the variable refers to cities. The shapefile is necessary in this process because it is the file that allows to use GIS software to calculate distances, the way the independent variable of the individual level analysis was constructed.

For the event study, I used the already calculated variables from Bentzen (2019). In her replication files, she has calculated a dummy capturing whether one or more earthquakes hit a given district between WVS waves and the number of earthquakes that hit the district between waves for each sub-national district in WVS for which there was more than one measurement (countries with more than one WVS wave). These variables were calculated in a rather complex and technical process. First, the earthquake database from Advanced National Seismic System (ANSS) is organized at the grid-cell level. In order to create the two variables capturing earthquake *incidence*, Bentzen (2019) followed similar process as the one described above to match the categories of sub-national districts present in the World Values Survey and those in the first administrative division shapefile. The latter was edited to match the divisions in the WVS. The earthquake database was linked to the shapefile using longitude and latitude information. GIS software was used to create a buffer of 100km around the border of each subnational district and to identify which of those buffers were hit by the epicenter of an earthquake in a given year. This information was then used to create the two final variables of a dummy capturing whether an earthquake hit between waves and the number of earthquakes that hit.

---

<sup>1</sup>A shapefile is a type of file that contains geographic information and is intended to be used with some geographic information system (GIS) software that allows to map the information.

## F Data on other disaster types

The data for alternative disasters originally come from and are publicly available at various sources. The dataset of tsunami events comes from the "Global Historical Tsunami Events and Runups" database from the National Geo-physical Data Center NOAA (2018) (available at <https://www.ngdc.noaa.gov/hazard/tsu.shtml>). From this raw data, I used GIS techniques to calculate the geodesic distance from the centroid of each sub-national district to the nearest tsunami ever recorded.

Tropical storm risk data is based on a map of tropical storm intensity zones derived from the Munich Reinsurance Company's (Munich Re) World Map of Natural Hazards Munich (1998). The intensity zones are calculated on the probability that a storm falls within five different speed categories on the Saffir-Simpson Hurricane Scale. The categories are the following:

1. 119-153 km/h: Very dangerous winds will produce some damage.
2. 154-177 km/h: Extremely dangerous winds will cause extensive damage.
3. 178-208 km/h: Devastating damage will occur.
4. 209-251 km/h: Catastrophic damage will occur.
5. 252 km/h or higher: Catastrophic damage will occur.

Finally, data on volcanic risk is based on volcanic eruption intensity zones. Original data come from a database of 1420 volcanic eruptions that span approximately the last 10,000 years Global Volcanism Program (2013) and transformed into volcanic eruption intensity zones and made readily available by Siebert et al. (2011); Bentzen (2019). Each eruption is spread over a radius of 100km around the eruption to define areas likely to be affected by it. The 'intensity' is measured via the the density of volcanic eruptions. To this end, the 0 to 6 Volcanic Explosivity Index (VEI), devised by Chris Newhall and Stephen Self, is used to rate volcanic eruptions. The index takes into account the explosivity and time period of the eruption. The key variable capturing exposure to volcanic risk measures geodesic distance of a sub-national district to the closest volcanic intensity zone 2 or above.



## G Correlations between risk of different disaster types

Correlations between the different disaster risk measures

|                           | dist(quake zones) | dist(tsunamis) | dist(storm risk zones) | dist(volcanic risk zones) |
|---------------------------|-------------------|----------------|------------------------|---------------------------|
| dist(quake zones)         | 1                 |                |                        |                           |
| dist(tsunamis)            | 0.3594            | 1              |                        |                           |
| dist(storm risk zones)    | 0.2192            | -0.0181        | 1                      |                           |
| dist(volcanic risk zones) | 0.3543            | 0.5209         | -0.0713                | 1                         |

## H Heterogeneous impact by income decile

Table 1

| VARIABLES                             | (1)<br>Incomes should be made more equal (1-10) |
|---------------------------------------|-------------------------------------------------|
| Distance to earthquake zones 3-4      | -0.311***<br>[0.087]                            |
| Income.decile2 * dist(quakezones3-4)  | 0.075<br>[0.083]                                |
| Income.decile3 * dist(quakezones3-4)  | 0.055<br>[0.071]                                |
| Income.decile4 * dist(quakezones3-4)  | 0.018<br>[0.076]                                |
| Income.decile5 * dist(quakezones3-4)  | 0.112<br>[0.086]                                |
| Income.decile6 * dist(quakezones3-4)  | 0.117<br>[0.083]                                |
| Income.decile7 * dist(quakezones3-4)  | 0.179*<br>[0.092]                               |
| Income.decile8 * dist(quakezones3-4)  | 0.194**<br>[0.095]                              |
| Income.decile9 * dist(quakezones3-4)  | 0.212**<br>[0.102]                              |
| Income.decile10 * dist(quakezones3-4) | 0.238**<br>[0.118]                              |
| Observations                          | 193,743                                         |
| R-squared                             | 0.157                                           |
| Baseline controls                     | Y                                               |
| Regions                               | 740                                             |
| Countries                             | 77                                              |

Standard errors in brackets, clustered at the first administrative division level. The interaction terms allow for the effect of the distance to earthquake zones 3 and 4 to vary by different income levels. Controls include dummies for all income decile levels, individual characteristics (age, age squared, sex, marital status, whether unemployed), and sub-national district geographical and developmental characteristics (latitude, distance to the coast, whether an earthquake occurred in that year or a year before, and night lights per squared in 2000). \*\*\* p<0.01, \*\* p<0.05, \* p<0.1

## I Other alternative explanations: risk attitudes and respect for tradition

There may be alternative mechanisms through which natural disasters affect attitudes toward inequality other than through the aforementioned psychological and relational channels. To investigate these concerns, I repeat the same empirical strategy of the individual level analysis but substituting the redistribution outcome for other traits that the literature has found to correlate with demand for redistribution and report the results in Table 2.

**Risk attitudes.** Are individuals more in favor of redistribution after a natural disaster due to changes in risk aversion? Individuals who are exposed to a natural disaster may update their beliefs about the riskiness of the environment which could alter their decision to demand more or less social insurance from the state against potential future shocks. This reasoning is in line with findings that economic shocks influence attitudes toward inequality through changes in risk attitudes (Rehm, 2009; Cusack et al., 2006; Moene and Wallerstein, 2001; Iversen and Soskice, 2001). More recently, (Pahontu, 2020) has found individuals nearly missed by hurricanes also shift their risk attitudes and this in turn influences the political party they support. Nevertheless, as reported in my investigation of alternative mechanisms shown in Table 2, there is no evidence here that natural disasters lead to changes in risk attitudes and thus these are unlikely to account for my main results. The lack of a correlation between disasters and risk attitudes could be due to several factors. For instance, different cultures may dictate different consequences of a disaster on risk attitudes. Secondly, the literature on how natural disasters may impact risk aversion is inconclusive<sup>2</sup>. Finally, it is not obvious that the null result is a measurement problem<sup>3</sup>. Indeed, recent work suggests survey measures of risk attitudes outperform measures taken through controlled choices between monetary lotteries Charness et al. (2013); Hertwig et al. (2019); Arslan et al. (2020)<sup>4</sup>.

**Trust.** Single country studies have found that natural disasters may affect both generalized trust and trust in government, albeit evidence on the direction of the relationship is mixed (Cassar et al., 2017; Toya and Skidmore, 2014; Ahsan, 2014; Dussailant and Guzmán, 2014). Generalized trust and trust in government have in turn been linked to preferences for redistribution, even though evidence for this connection is also mixed (Peyton, 2020). As shown in Table 2, I find no evidence that exposure to disasters affects trust in government<sup>5</sup>.

**Respect for tradition.** According to evolutionary anthropological theories of social learning, individuals in unstable environments are less likely to copy from earlier generations and more likely to come up with solutions to problems on their own (Richardson and Boyd, 1985; Rogers, 1988; Feldman et al., 1996; Aoki and Feldman, 1987). In more stable environments, the theory goes, the benefits of social learning are higher and thus individuals are more likely to stick to the solutions offered by previous generations and show higher respect for tradition. In a worldwide test of this hypothesis using global temperature data and the World Values Survey, Giuliano and Nunn (2017) find evidence in support of it. Perhaps being close to disaster risk zones also makes individuals less likely to respect

---

<sup>2</sup>Some studies find natural disasters make individuals more risk loving (Eckel et al., 2009; Hanaoka et al., 2018; Page et al., 2014; Bchir et al., 2013) while others find the opposite (Van Den Berg et al., 2009; Reynaud and Aubert, 2014; Cameron and Shah, 2015; Cassar et al., 2017).

<sup>3</sup>Here, risk attitudes are measured through a World Values Survey question that asks respondents to what extent the following statement describes you: *"It is important to this person: adventure and taking risks"*. Possible answers range from 1 (Very much like me) to 5 (Not at all like me). This same question has been used to measure risk attitudes in recent work (e.g. Bénabou et al. (2015)).

<sup>4</sup>As a possible explanation for this, some suggest that "the fairly vague, almost projective nature of a comprehensive single-item question allows people to refer back to their diagnostic memories and behaviours using a well-honed human capacity for social perception" (Arslan et al., 2020, p.10).

<sup>5</sup>Results are also insignificant for generalized trust, these are available upon request.

tradition, loosen their kinship ties<sup>6</sup>, and more likely to turn to the state for help. To investigate this possibility, I employ the same question from the World Values Survey used by Giuliano and Nunn (2017) in their study of respect for tradition and unstable environments. As shown in Table 2, there is no evidence that proximity to high intensity earthquake zones affects respect for tradition.

Table 2

| VARIABLES                    | (1)<br>Hard work  | (2)<br>Risk loving | (3)<br>Open<br>New ideas | (4)<br>Life<br>satisfaction | (5)<br>Trust gov | (6)<br>Tradition |
|------------------------------|-------------------|--------------------|--------------------------|-----------------------------|------------------|------------------|
| Distance to earthq zones 3-4 | 0.151*<br>[0.082] | 0.039<br>[0.167]   | 0.293*<br>[0.164]        | 0.134*<br>[0.073]           | 0.048<br>[0.037] | 0.01<br>[0.042]  |
| Observations                 | 171,535           | 57,536             | 74,437                   | 214,189                     | 200,287          | 109,490          |
| R-squared                    | 0.112             | 0.09               | 0.139                    | 0.213                       | 0.179            | 0.198            |
| Baseline controls            | Y                 | Y                  | Y                        | Y                           | Y                | Y                |
| Regions                      | 690               | 307                | 349                      | 740                         | 715              | 544              |
| Countries                    | 76                | 48                 | 51                       | 77                          | 76               | 64               |

To construct these results, I employ the same empirical strategy as in Table 1, Panel C but changing the outcomes to a series of variables capturing different mechanisms from Figure 2 (belief in hard work, decreased respect for tradition, trust in government, and risk attitudes). Standard errors in brackets, clustered at the first administrative division level. \*\*\*  $p < 0.01$ , \*\*  $p < 0.05$ , \*  $p < 0.1$

<sup>6</sup>See Alesina and Giuliano (2014) for a discussion of how weaker kinship or family ties are associated with higher preference for redistribution.

## References

- Ahsan, D.A., 2014. Does natural disaster influence people's risk preference and trust? an experiment from cyclone prone coast of bangladesh. *International journal of disaster risk reduction* 9, 48–57.
- Alesina, A., Giuliano, P., 2014. Family ties, in: *Handbook of economic growth*. Elsevier. volume 2, pp. 177–215.
- Aoki, K., Feldman, M.W., 1987. Toward a theory for the evolution of cultural communication: Coevolution of signal transmission and reception. *Proceedings of the National Academy of Sciences* 84, 7164–7168.
- Arslan, R.C., Brümmer, M., Dohmen, T., Drewelies, J., Hertwig, R., Wagner, G.G., 2020. How people know their risk preference. *Scientific Reports* .
- Bchir, M.A., Willinger, M., et al., 2013. Does the exposure to natural hazards affect risk and time preferences? some insights from a field experiment in perú. *Unpublished Manuscript* .
- Bénabou, R., Ticchi, D., Vindigni, A., 2015. Religion and innovation. *American Economic Review* 105, 346–51.
- Bentzen, J., 2019. Acts of god? religiosity and natural disasters across subnational world districts. *The Economic Journal* 129, 2295–2321.
- Cameron, L., Shah, M., 2015. Risk-taking behavior in the wake of natural disasters. *Journal of Human Resources* 50, 484–515.
- Cassar, A., Healy, A., Von Kessler, C., 2017. Trust, risk, and time preferences after a natural disaster: experimental evidence from thailand. *World Development* 94, 90–105.
- Charness, G., Gneezy, U., Imas, A., 2013. Experimental methods: Eliciting risk preferences. *Journal of Economic Behavior & Organization* 87, 43–51.
- Cusack, T., Iversen, T., Rehm, P., 2006. Risks at work: The demand and supply sides of government redistribution. *Oxford Review of Economic Policy* 22, 365–389.
- Dussaillant, F., Guzmán, E., 2014. Trust via disasters: the case of chile's 2010 earthquake. *Disasters* 38, 808–832.
- Eckel, C.C., El-Gamal, M.A., Wilson, R.K., 2009. Risk loving after the storm: A bayesian-network study of hurricane katrina evacuees. *Journal of Economic Behavior & Organization* 69, 110–124.
- Feldman, M.W., Aoki, K., Kumm, J., 1996. Individual versus social learning: evolutionary analysis in a fluctuating environment. *Anthropological Science* 104, 209–231.
- Giuliano, P., Nunn, N., 2017. Understanding cultural persistence and change. *Technical Report*. National Bureau of Economic Research.
- Global Volcanism Program, 2013. *Volcanoes of the world*, v. 4.9.1. venzke, e (ed.). Smithsonian Institution. Downloaded 01 Oct 2018. <https://doi.org/10.5479/si.GVP.VOTW4-2013>.
- Hanaoka, C., Shigeoka, H., Watanabe, Y., 2018. Do risk preferences change? evidence from the great east japan earthquake. *American Economic Journal: Applied Economics* 10, 298–330.
- Hertwig, R., Wulff, D.U., Mata, R., 2019. Three gaps and what they may mean for risk preference. *Philosophical Transactions of the Royal Society B* 374, 20180140.

- Iversen, T., Soskice, D., 2001. An asset theory of social policy preferences. *American political science review* 95, 875–893.
- Moene, K.O., Wallerstein, M., 2001. Inequality, social insurance, and redistribution. *American Political Science Review* 95, 859–874.
- Munich, R., 1998. *World map of natural hazards*. Munich: Munich Reinsurance Company .
- National Geophysical Data Center / World Data Service, 2018. Ncei/wds global historical tsunami database. NOAA National Centers for Environmental Information. doi:10.7289/V5PN93H7 Data retrieved from NOAA National Centers for Environmental Information on September 1st 2018.
- Page, L., Savage, D.A., Torgler, B., 2014. Variation in risk seeking behaviour following large losses: A natural experiment. *European Economic Review* 71, 121–131.
- Pahontu, R.L., 2020. The democrat disaster: Hurricane exposure, risk aversion and insurance demand. *Risk Aversion and Insurance Demand* (January 2020) .
- Peyton, K., 2020. Does trust in government increase support for redistribution? evidence from randomized survey experiments. *American Political Science Review* 114, 596–602.
- Rehm, P., 2009. Risks and redistribution: An individual-level analysis. *Comparative political studies* 42, 855–881.
- Reynaud, A., Aubert, C., 2014. Do natural disasters modify risk preferences? evidence from a field experiment in vietnam. *Unpublished Manuscript* .
- Richardson, P., Boyd, R., 1985. Culture and the evolutionary process.
- Rogers, A.R., 1988. Does biology constrain culture? *American Anthropologist* 90, 819–831.
- Siebert, L., Simkin, T., Kimberly, P., 2011. *Volcanoes of the World*. Univ of California Press.
- Toya, H., Skidmore, M., 2014. Do natural disasters enhance societal trust? *Kyklos* 67, 255–279.
- Van Den Berg, M., Fort, R., Burger, K., 2009. *Natural hazards and risk aversion: Experimental evidence from Latin America*. Technical Report.
